# Supplementary material for: Persistent microbial dysbiosis in preterm premature rupture of membranes from onset until delivery
Source: PeerJ. 2015 Nov 26;3:e1398. doi: 10.7717/peerj.1398 (PMC4671185; doi:10.7717/peerj.1398)
Supplement: Table S1 [file peerj-03-1398-s001.xlsx]

## Sheet: Sheet1
Questionnaire
ID	Age	Racial/ethnic background	Currently experiencing any vaginal pain or discomfort	Vaginal pain or discomfort (choice='Soreness')	Vaginal pain or discomfort (choice='Other')	Currently experiencing lower abdominal or pelvic pain	Pelvic pain (choice='Dull aching')	Pelvic pain (choice='Sharp or acute pain')	Pelvic pain (choice='Occasional')	Pelvic pain (choice='Only during certain activities')	Pelvic pain (choice='Other')	Chronic medical conditions	Chronic medical condition (choice='Inflammatory Bowel Disease')	Chronic medical condition (choice='Skin Rashes')	Chronic medical condition (choice='Other')	Cigarette smoking	Average number of cigarettes per day	Current alcohol ingestion	Alcoholic drinks per day	Alcoholic beverages per week
PPROM-11	27	White or Caucasian	No	Unchecked	Unchecked	Yes	Checked	Checked	Unchecked	Unchecked	Unchecked	No	Unchecked	Unchecked	Unchecked	No		No
PPROM-12	30	White or Caucasian	Yes	Checked	Checked	No	Unchecked	Unchecked	Unchecked	Unchecked	Unchecked	Yes	Checked	Checked	Checked	No		No
PPROM-13	33	White or Caucasian	Yes	Checked	Checked	No	Unchecked	Unchecked	Unchecked	Unchecked	Unchecked	No	Unchecked	Unchecked	Unchecked	No		Yes	0
PPROM-14	27	White or Caucasian	No	Unchecked	Unchecked	No	Unchecked	Unchecked	Unchecked	Unchecked	Unchecked	No	Unchecked	Unchecked	Unchecked	No		No
PPROM-18	32	Near East Asian	No	Unchecked	Unchecked	No	Unchecked	Unchecked	Unchecked	Unchecked	Unchecked	No	Unchecked	Unchecked	Unchecked	No		No
PPROM-8	29	White or Caucasian	Yes	Checked	Unchecked	Yes	Unchecked	Unchecked	Unchecked	Unchecked	Checked	Yes	Checked	Unchecked	Unchecked	No		Yes	1
PPROM-9	26	White or Caucasian	No	Unchecked	Unchecked	Yes	Unchecked	Unchecked	Unchecked	Checked	Unchecked	No	Unchecked	Unchecked	Unchecked	No		No
PPROM-1	33	White or Caucasian	No	Unchecked	Unchecked	No	Unchecked	Unchecked	Unchecked	Unchecked	Unchecked	No	Unchecked	Unchecked	Unchecked	Yes	10 or more	No
PPROM-15	37	White or Caucasian	No	Unchecked	Unchecked	No	Unchecked	Unchecked	Unchecked	Unchecked	Unchecked	No	Unchecked	Unchecked	Unchecked	No		No
PPROM-16	26	White or Caucasian	No	Unchecked	Unchecked	No	Unchecked	Unchecked	Unchecked	Unchecked	Unchecked	No	Unchecked	Unchecked	Unchecked	No		No
PPROM-17	30	White or Caucasian	No	Unchecked	Unchecked	No	Unchecked	Unchecked	Unchecked	Unchecked	Unchecked	No	Unchecked	Unchecked	Unchecked	No		No
PPROM-2	29	White or Caucasian		Unchecked	Unchecked		Unchecked	Unchecked	Unchecked	Unchecked	Unchecked		Unchecked	Unchecked	Unchecked
PPROM-5	19	White or Caucasian	No	Unchecked	Unchecked	Yes	Unchecked	Unchecked	Checked	Unchecked	Unchecked	Yes	Unchecked	Checked	Unchecked	No		Occasionally		2
PPROM-6	26	White or Caucasian	No	Unchecked	Unchecked	No	Unchecked	Unchecked	Unchecked	Unchecked	Unchecked	No	Unchecked	Unchecked	Unchecked	No		No
PPROM-7	31	White or Caucasian	No	Unchecked	Unchecked	No	Unchecked	Unchecked	Unchecked	Unchecked	Unchecked	No	Unchecked	Unchecked	Unchecked	No		No
Medical Information
ID	Gravid status	Parity	Previous preterm births (Defined as anytime before 37 weeks gestation)	Number of preterm deliveries	Preterm contractions with prior pregnancies	Outcomes of Prior Preterm Contractions (choice='Preterm Delivery between 36 - 37 0/7 weeks')	Outcomes of Prior Preterm Contractions (choice='Preterm Delivery between 34 - 36 0/7 weeks')	Initial Reason(s) for patient presenting to FBC (choice='PPROM ( < 37 weeks gestation)')	Type of Antibiotics / Dose prescribed (choice='Ampicillin 2 Gm q6hrs on days 1 and 2')	Type of Antibiotics / Dose prescribed (choice='Ampicillin 1 Gm q6hrs on days 1 and 2')	Type of Antibiotics / Dose prescribed (choice='Clindamycin 900mg q8hrs on days 1 and 2')	Type of Antibiotics / Dose prescribed (choice='Amoxicillin 250 mg qhrs on days 3 - 7')	Type of Antibiotics / Dose prescribed (choice='Azithromycin 1000 mg on days 1 and 5')	Type of Antibiotics / Dose prescribed (choice='Penicillin 5 milliunits x1, then 2.5 milliunits q4hrs until delivery')	Indication for Delivery (choice='Scheduled at 34 weeks gestation')	Indication for Delivery (choice='Spontaneous onset of labor')	Indication for Delivery (choice='Other')	Type of Delivery	Complications during Active Labor	Complications during Active Labor (choice='Maternal fever (>38.1 C)')	Complications during Active Labor (choice='Fetal Tachycardia')	Placental pathology findings (choice='Unremarkable')	Placental pathology findings (choice='Evidence of Chorioamnionitis')	Antibiotics given during labor	Antibiotics given at delivery
PPROM-11	2	1	No		No	Unchecked	Unchecked	Checked	Checked	Unchecked	Unchecked	Unchecked	Checked	Unchecked	Unchecked	Unchecked	Checked	C-Section, emergency	No	Unchecked	Unchecked	Checked	Unchecked	Unchecked	Checked
PPROM-12	1					Unchecked	Unchecked	Checked	Checked	Unchecked	Unchecked	Unchecked	Checked	Unchecked	Unchecked	Checked	Unchecked	NSVD	No	Unchecked	Unchecked	Checked	Unchecked	Checked	Unchecked
PPROM-13	5	3	No		No	Unchecked	Unchecked	Checked	Checked	Unchecked	Unchecked	Unchecked	Checked	Unchecked	Checked	Unchecked	Unchecked	NSVD	No	Unchecked	Unchecked	Unchecked	Checked	Checked	Unchecked
PPROM-14	5	1	No		No	Unchecked	Unchecked	Checked	Checked	Unchecked	Unchecked	Unchecked	Unchecked	Unchecked	Unchecked	Checked	Unchecked	NSVD	No	Unchecked	Unchecked	Checked	Unchecked	Checked	Unchecked
PPROM-18	3	1	Yes	One	No	Unchecked	Unchecked	Checked	Checked	Unchecked	Unchecked	Checked	Checked	Unchecked	Unchecked	Checked	Unchecked	Scheduled C-section (breech or elective)	No	Unchecked	Unchecked	Checked	Unchecked	Checked	Checked
PPROM-8	1					Unchecked	Unchecked	Checked	Unchecked	Unchecked	Unchecked	Unchecked	Unchecked	Checked	Unchecked	Checked	Unchecked	NSVD	No	Unchecked	Unchecked	Checked	Unchecked	Checked	Unchecked
PPROM-9	2	1	No		No	Unchecked	Unchecked	Checked	Unchecked	Checked	Unchecked	Unchecked	Checked	Unchecked	Checked	Unchecked	Unchecked	NSVD	No	Unchecked	Unchecked	Checked	Unchecked	Unchecked	Unchecked
PPROM-1	4	2	No		Unknown	Unchecked	Unchecked	Checked	Unchecked	Unchecked	Checked	Unchecked	Checked	Unchecked	Unchecked	Checked	Unchecked	NSVD	No	Unchecked	Unchecked	Checked	Unchecked	Unchecked	Unchecked
PPROM-15	3	1	Yes	One	Yes	Unchecked	Checked	Checked	Checked	Unchecked	Unchecked	Checked	Checked	Unchecked	Unchecked	Checked	Unchecked	Scheduled C-section (breech or elective)	No	Unchecked	Unchecked	Unchecked	Checked	Unchecked	Checked
PPROM-16	4	1	Yes	One	No	Unchecked	Unchecked	Checked	Checked	Unchecked	Unchecked	Checked	Checked	Unchecked	Checked	Unchecked	Unchecked	Scheduled C-section (breech or elective)	No	Unchecked	Unchecked	Checked	Unchecked	Unchecked	Checked
PPROM-17	2	1	Yes	One	Yes	Checked	Unchecked	Checked	Checked	Unchecked	Unchecked	Checked	Checked	Unchecked	Unchecked	Checked	Unchecked	NSVD	No	Unchecked	Unchecked	Checked	Unchecked	Unchecked	Unchecked
PPROM-2	2	1	No		No	Unchecked	Unchecked	Checked	Unchecked	Unchecked	Checked	Unchecked	Checked	Unchecked	Unchecked	Checked	Unchecked	NSVD	No	Unchecked	Unchecked	Unchecked	Checked	Unchecked	Unchecked
PPROM-5	1					Unchecked	Unchecked	Checked	Checked	Unchecked	Unchecked	Checked	Checked	Unchecked	Unchecked	Checked	Unchecked	NSVD	No	Unchecked	Unchecked	Checked	Unchecked	Checked	Unchecked
PPROM-6	1					Unchecked	Unchecked	Checked	Checked	Unchecked	Unchecked	Checked	Checked	Unchecked	Unchecked	Checked	Unchecked	Scheduled C-section (breech or elective)	No	Unchecked	Unchecked	Checked	Unchecked	Unchecked	Checked
PPROM-7	1					Unchecked	Unchecked	Checked	Checked	Unchecked	Unchecked	Checked	Checked	Unchecked	Unchecked	Unchecked	Unchecked	NSVD	Yes	Checked	Checked	Unchecked	Checked	Checked	Unchecked
